# Supplementary material for: Luminescent Conjugated Oligothiophenes for Sensitive Fluorescent Assignment of Protein Inclusion Bodies
Source: PubMed Central journal article supplement (PMC3743175; doi:10.1002/cbic.201200731), 2013-02-28
Supplement: cbic0014-0607-SD1.pdf [file cbic0014-0607-SD1.pdf]

# CHEMBIOCHEM

## Supporting Information

© Copyright Wiley-VCH Verlag GmbH & Co. KGaA, 69451 Weinheim, 2013

### **Luminescent Conjugated Oligothiophenes for Sensitive Fluorescent Assignment of Protein Inclusion Bodies**

Therése Klingstedt,<sup>[a]</sup> Cristiane Blechschmidt,<sup>[b]</sup> Anna Nogalska,<sup>[c]</sup> Stefan Prokop,<sup>[b]</sup>  
Bo Häggqvist,<sup>[d]</sup> Olof Danielsson,<sup>[d]</sup> W. King Engel,<sup>[c]</sup> Valerie Askanas,<sup>[c]</sup> Frank L. Heppner,<sup>[b]</sup>  
and K. Peter R. Nilsson\*<sup>[a]</sup>

cbic\_201200731\_sm\_miscellaneous\_information.pdf

**Supplemental Table 1: Clinical diagnosis and tinctorial properties of the included cases**

| <i>Case number</i> | <i>Diagnosis</i> | <i>Age/Sex</i> | <i>p62</i> | <i>p-FTAA</i> |
|--------------------|------------------|----------------|------------|---------------|
| 1                  | s-IBM            | 78/M           | +          | +             |
| 2                  | s-IBM            | 62/M           | +          | +             |
| 3                  | s-IBM            | 56/M           | +          | +             |
| 4                  | s-IBM            | 65/M           | +          | +             |
| 5                  | s-IBM            | 65/M           | +          | +             |
| 6                  | s-IBM            | 55/M           | +          | +             |
| 7                  | s-IBM            | 70/F           | +          | +             |
| 8                  | s-IBM            | 74/M           | +          | +             |
| 9                  | s-IBM            | 74/F           | +          | +             |
| 10                 | s-IBM            | 53/M           | +          | +             |
| 11                 | s-IBM            | 41/M           | +          | +             |
| 12                 | s-IBM            | 81/F           | +          | +             |
| 13                 | s-IBM            | 70/M           | +          | +             |
| 14                 | s-IBM            | 74/F           | +          | +             |
| 15                 | s-IBM            | 49/M           | +          | +             |
| 16                 | s-IBM            | 68/M           | +          | +             |
| 17                 | s-IBM            | 72/M           | +          | +             |
| 18                 | s-IBM            | 64/M           | +          | +             |
| 19                 | s-IBM            | 68/M           | +          | +             |
| 20                 | s-IBM            | 60/F           | +          | +             |
| 21                 | s-IBM            | 58/M           | +          | +             |
| 22                 | s-IBM            | 73/M           | +          | +             |
| 23                 | s-IBM            | 82/F           | +          | +             |
| 28                 | Polymyositis     | 58/F           | -          | -             |
| 29                 | Polymyositis     | 50/F           | -          | -             |
| 30                 | Dermatomyositis  | 84/F           | -          | -             |
| 31                 | Dermatomyositis  | 57/F           | -          | -             |
| 32                 | Dermatomyositis  | 71/M           | -          | -             |
| 33                 | ALS              | 38/M           | -          | -             |
| 34                 | ALS              | 63/M           | -          | -             |
| 35                 | ALS              | 73/M           | -          | -             |
| 36                 | Polyneuropathy   | 61/F           | -          | -             |
| 37                 | Polyneuropathy   | 68/M           | -          | -             |
| 38                 | Polyneuropathy   | 50/M           | -          | -             |
| 39                 | Normal control   | 69/M           | -          | -             |
| 40                 | Normal control   | 80/M           | -          | -             |
| 41                 | Normal control   | 58/F           | -          | -             |
| 42                 | Normal control   | 43/M           | -          | -             |
| 43                 | Normal control   | 41/F           | -          | -             |
| 44                 | Normal control   | 30/F           | -          | -             |
| 45                 | Normal control   | 67/F           | -          | -             |
| 46                 | Normal control   | 80/M           | -          | -             |
| 47                 | Normal control   | 67/M           | -          | -             |
| 48                 | Normal control   | 66/F           | -          | -             |
| 49                 | Normal control   | 70/M           | -          | -             |

s-IBM; sporadic inclusion body myositis

ALS; amyotrophic lateral sclerosis

M; male

F; female

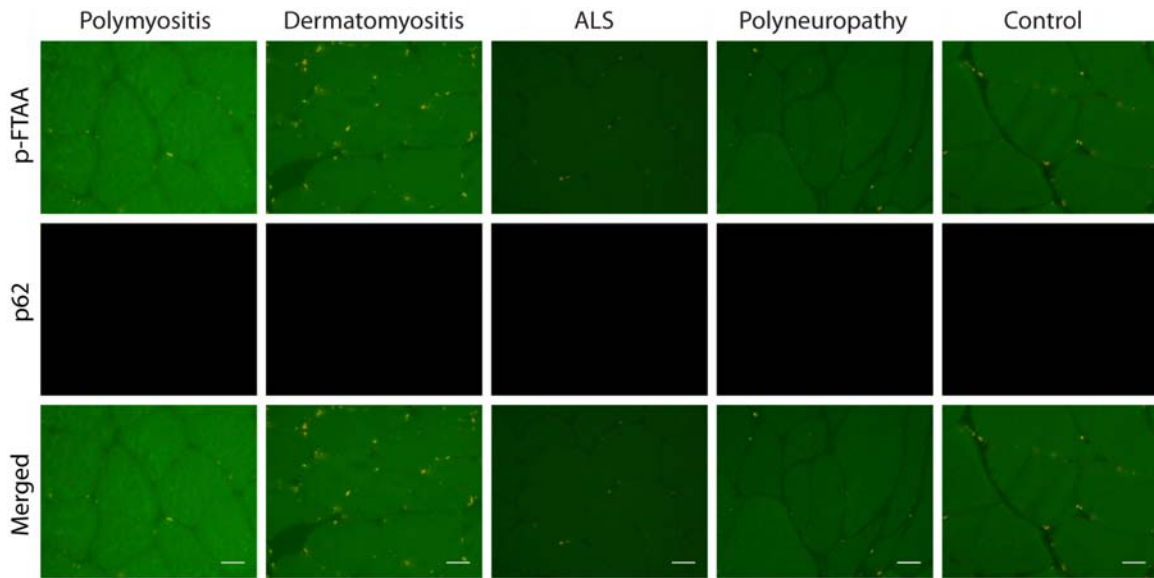

**Supplemental Figure S1.** Fluorescence images of muscle sections from patients with polymyositis, dermatomyositis, amyotrophic lateral sclerosis (ALS) or polyneuropathy as well as from control individual without muscle pathology double-stained with p-FTAA and antibody against p62. Scale bars represent 20  $\mu$ m.

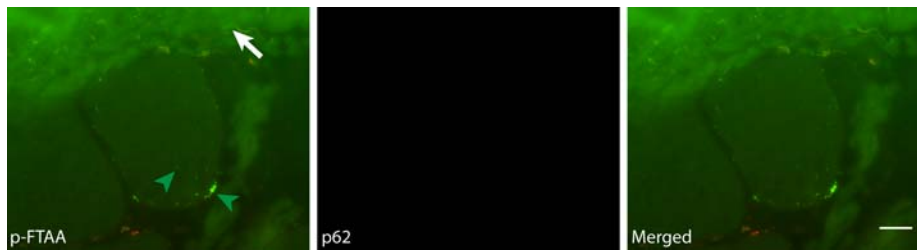

**Supplemental Figure S2.** Demonstration of structures in skeletal muscle fibers labeled with p-FTAA, but not p62 antibody. The structures were very small and often found in the subsarcolemmal region or scattered in the sarcoplasm (green arrowheads). The green structure in the top of the figure is autofluorescence from connective tissue (white arrow). Scale bar represents 20  $\mu$ m.
